# Supplementary material for: An on-chip pollutant toxicity determination based on marine microalgal swimming inhibition
Source: Royal Society of Chemistry journal article supplement (doi:10.1039/c5an02384j), 2016-01-01
Supplement: c5an02384j1.pdf [file c5an02384j1.pdf]

Table S1 Microalgal motility characteristics calculated by the ImageJ plugin

---

|                                             |                                                                                                                                                                                                                                                                                                                                                                                                                                                 |
|---------------------------------------------|-------------------------------------------------------------------------------------------------------------------------------------------------------------------------------------------------------------------------------------------------------------------------------------------------------------------------------------------------------------------------------------------------------------------------------------------------|
| Percent motile cells of total cells (MOT %) | Percent of tracked microalgae identified by the plugin as exhibiting motility during the period of analysis                                                                                                                                                                                                                                                                                                                                     |
| Curvilinear velocity (VCL)                  | The total point to point distance traveled by the microalga over the time period analyzed averaged to a per second value                                                                                                                                                                                                                                                                                                                        |
| Average path velocity (VAP)                 | Velocity over an average path, generated by a roaming average of microalgal position from one-sixth of the video's frame rate, such that each point is generated by averaging the coordinates of a set number of locations on the VCL path (using 25 fps, the location of a sperm in 4 frames are averaged to generate one VAP point and the first VAP point represents frames 1–4, the second point frame 2–5); averaged to a per second value |
| Straight line velocity (VSL)                | The maximum distance moved on the VAP path by the microalga from the first VAP point during in the video segment analyzed, calculated to a per second value based on the number of frames for which VAP points were calculated                                                                                                                                                                                                                  |

---

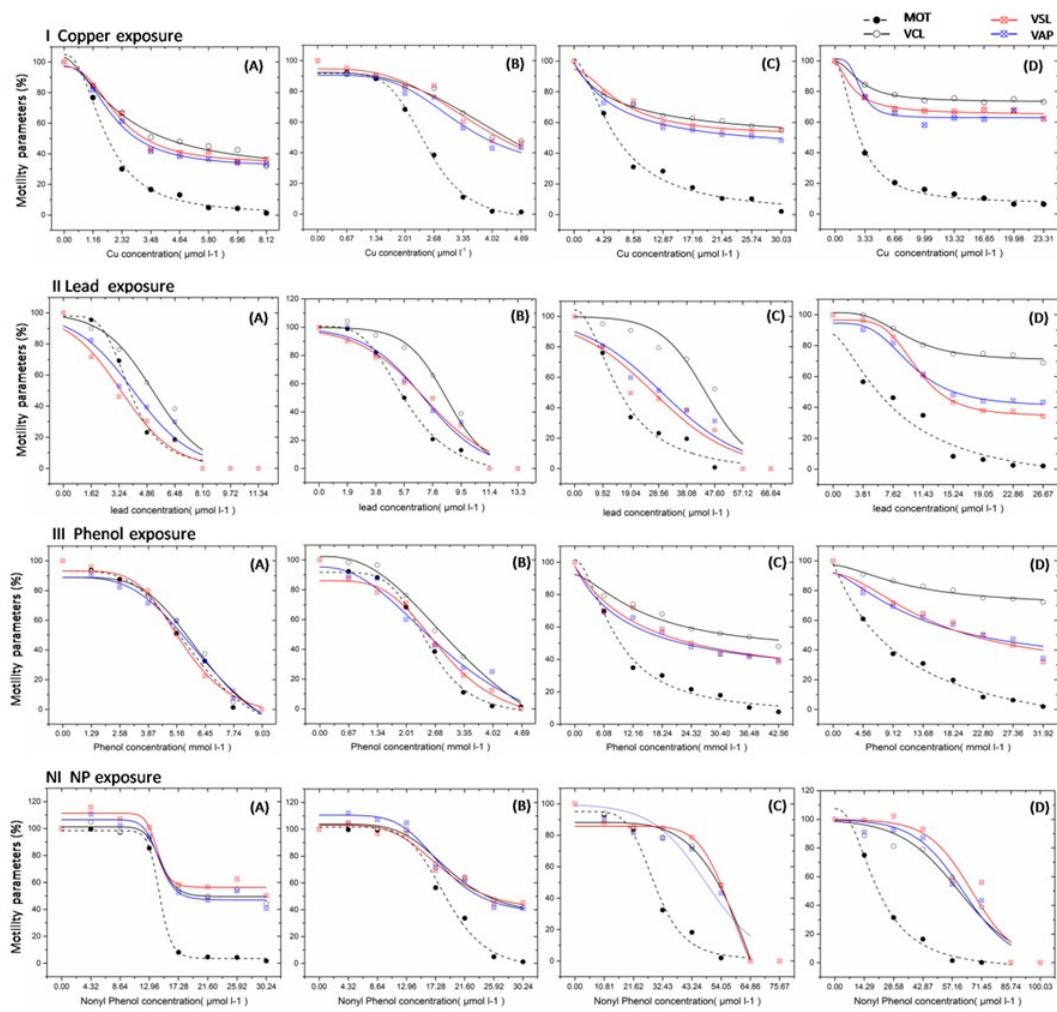

**Fig. S1.** Two-hour motility inhibition curves exposed to different measured concentrations of I. Copper, II. Lead, III. Phenol and IN. NP for the four marine microalgae (A) *P. subcordiformis*; (B) *P. helgolandica* var. *tsingtaoensis*; (C) *I. galbana* and (D) *I. zhanjiangensis* sp.nov;
